# Supplementary material
Source: PubMed Central journal article supplement (PMC6439807)
Supplement: jamaotolaryngolheadnecksurg-145-14-s001.pdf [file jamaotolaryngolheadnecksurg-145-14-s001.pdf]

## **Data Sharing Statement**

Sayed-Hassan, Hermann R, Chidiac, et al. Association of the duration of antibiotic therapy with major surgical site infection in cochlear implantation. *JAMA Otolaryngol Head Neck Surg.* doi:10.1001/jamaoto.2018.1998

## **Data**

**Data available:** No

## **Additional Information**

**Explanation for why data not available:** We mean that we have all the data points recorded that can be presented to reviewers, or any colleagues who would like to check a point, but it is not public to everyone to protect the patients
